# Supplementary material
Source: MDPI journal article supplement (https://www.mdpi.com/1999-4907/12/7/848)
Supplement: s1 [file s1]

# Supplementary materials

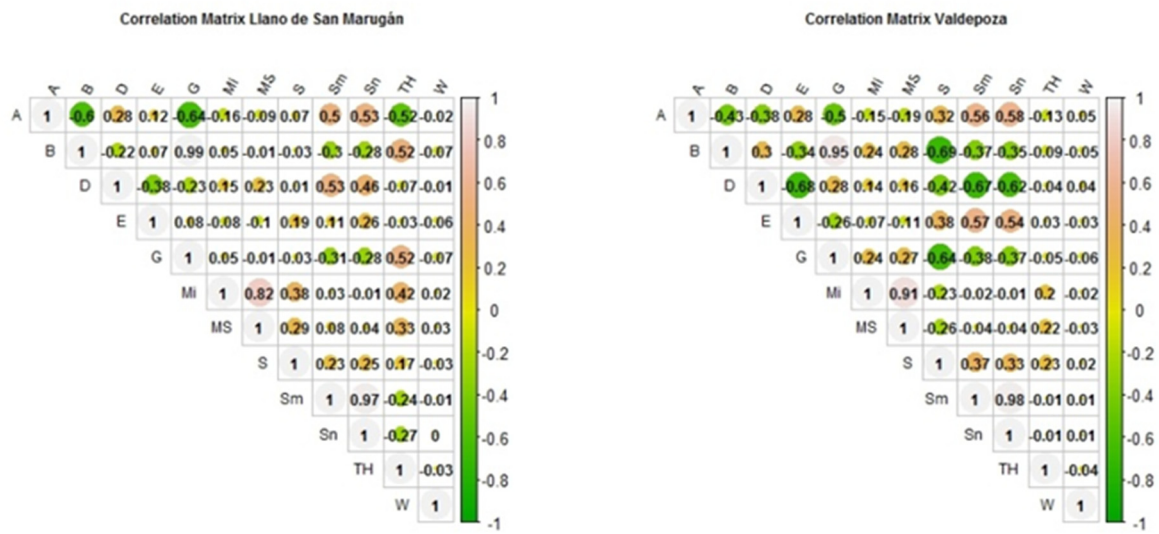

**Figure S1.** Correlation matrix using corplot package in R (Wei and Simko, 2017). The correlation number is presented at significance level 0.05 for both experimental sites.

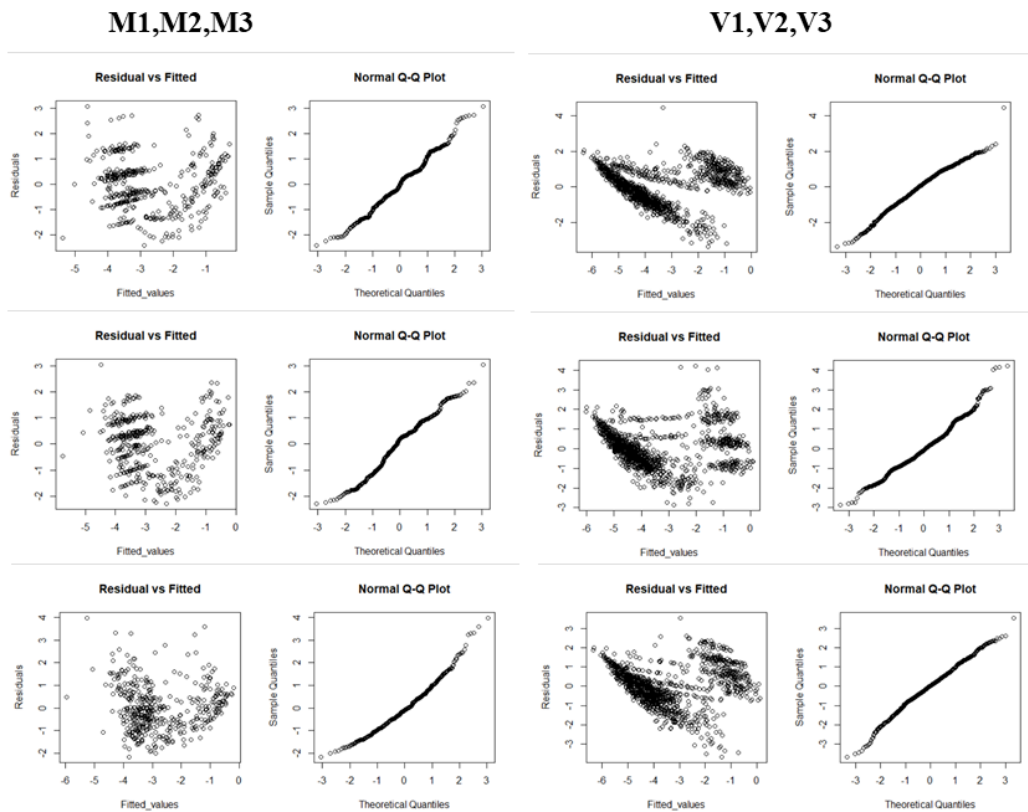

**Figure S2.** Residual graphs are referred in the first column to Llano de San Marugán (models M1, M2 and M3), and in the second column to Valdepoza (models V1, V2 y V3). On the left we examine the predicted versus residual plot with the

predicted values on the x-axis and the residuals on the y-axis. On the right, quantile-quantile plot (q-q plot). Notice the x-axis for the theoretical quantiles and the y-axis for sample quantiles.

*Qf1, Qf2, Qf3*

*Qi1, Qi2, Qi3*

*Jt1, Jt2, Jt3*

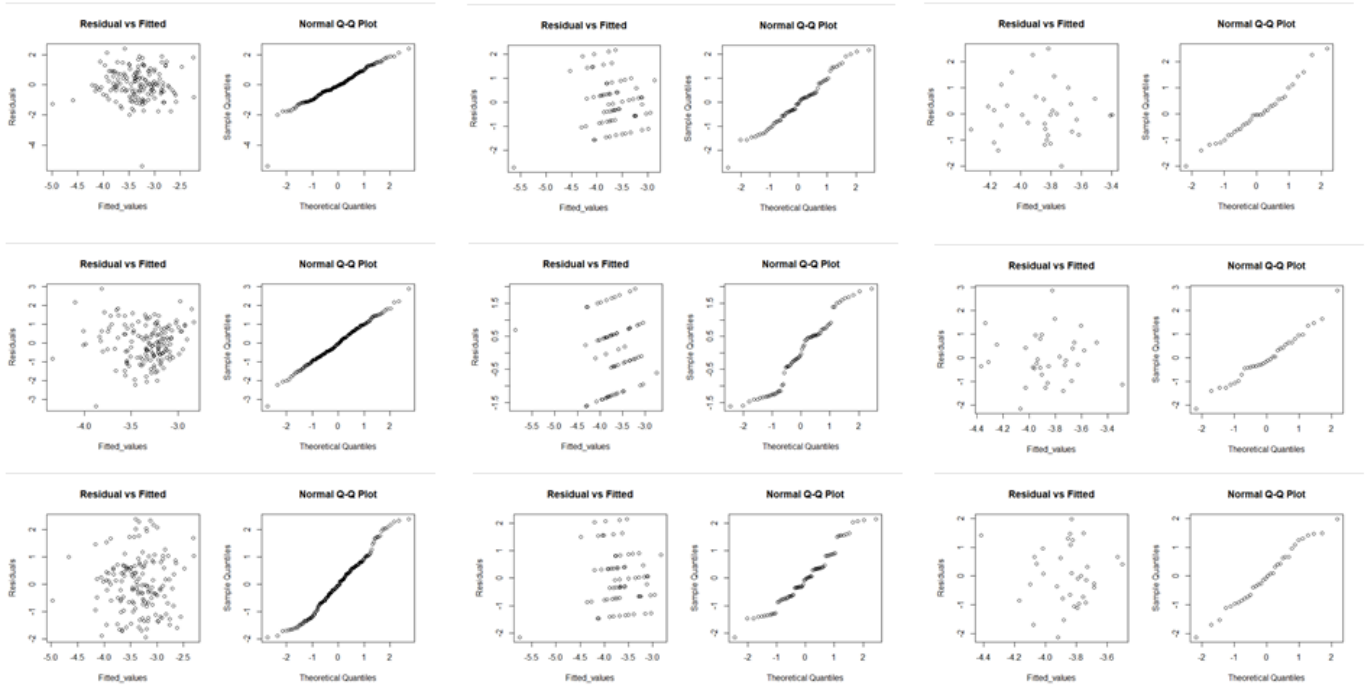

**Figure S3.** Residual graphs are referred in the first column to *Quercus faginea* (Qf1, Qf2, Qf3), the second column to *Quercus ilex* (Qi1, Qi2, Qi3), and the third to *Juniperus thurifera* (Jt1, Jt2, Jt3). On the left we examine the predicted versus residual plot with the predicted values on the x-axis and the residuals on the y-axis. On the right, quantile-quantile plot (q-q plot). Notice the x-axis for the theoretical quantiles and the y-axis for sample quantiles.

*Qp1, Qp2, Qp3*

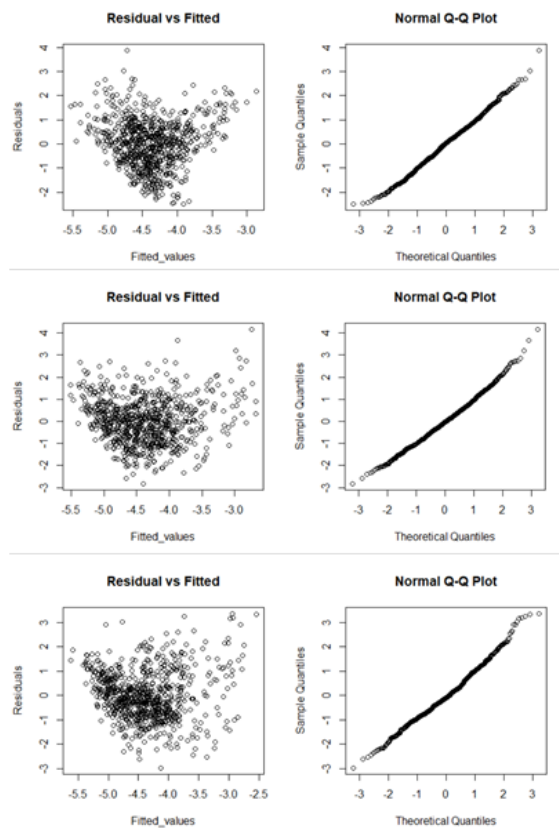

**Figure S4.** Residual graphs of *Quercus pyrenaica* models (*Qp1*, *Qp2*, *Qp3*). On the left we examine the predicted versus residual plot with the predicted values on the x-axis and the residuals on the y-axis. On the right, quantile-quantile plot (q-q plot). Notice the x-axis for the theoretical quantiles and the y-axis for sample quantiles.

*Ps1,Ps2,Ps3,Ps4*

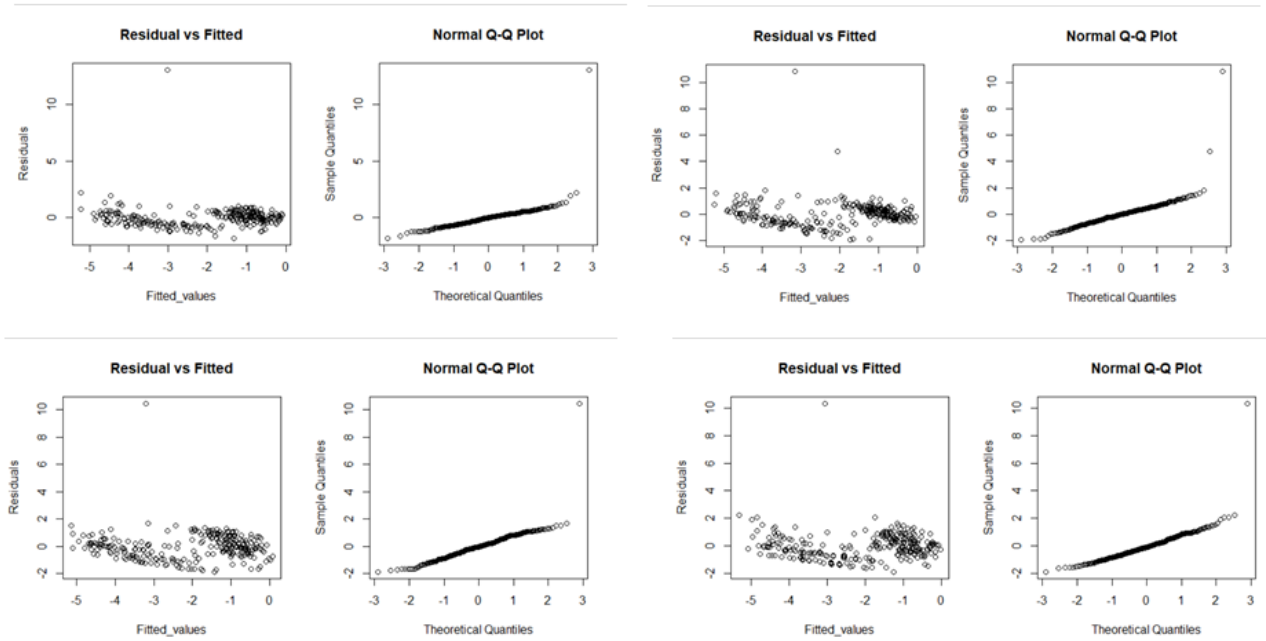

**Figure S5.** Residual graphs of *Pinus sylvestris* models (*Ps1*, *Ps2*, *Ps3*, *Ps4*). On the left we examine the predicted versus residual plot with the predicted values on the x-axis and the residuals on the y-axis. On the right, quantile-quantile plot (q-q plot). Notice the x-axis for the theoretical quantiles and the y-axis for sample quantiles.

*Pn1, Pn2, Pn3, Pn4*

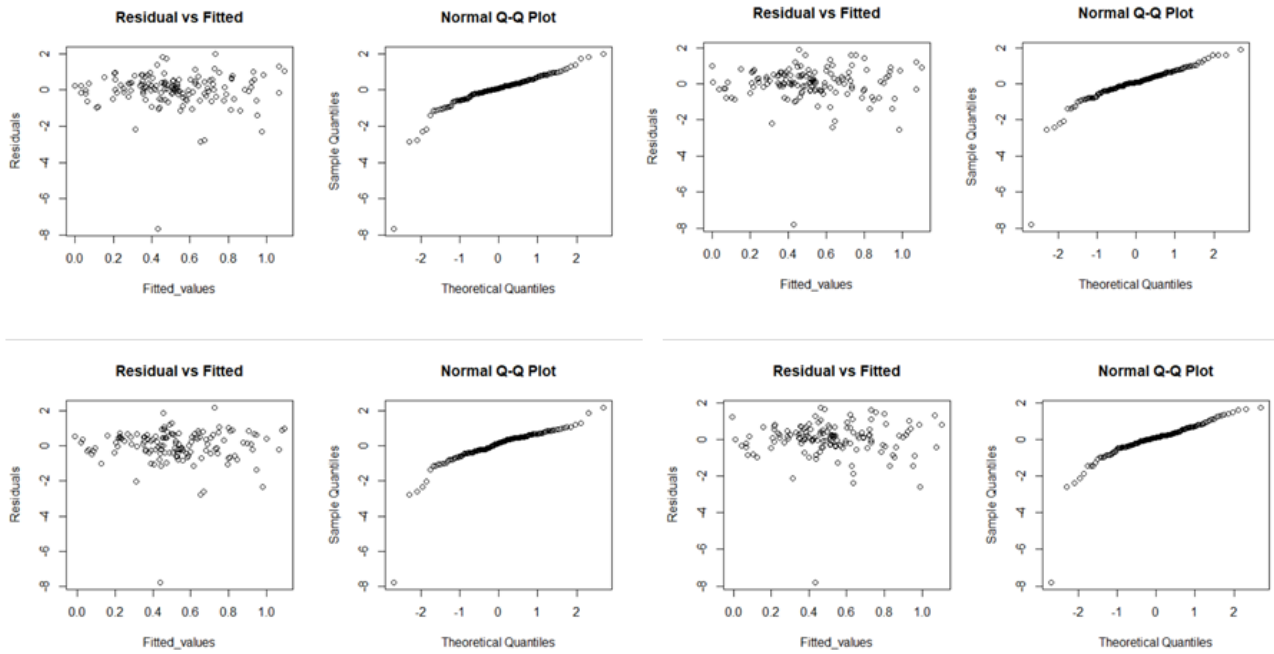

**Figure S6.** Residual graphs of *Pinus nigra* models (*Pn1*, *Pn2*, *Pn3*, *Pn4*). On the left we examine the predicted versus residual plot with the predicted values on the x-axis and the residuals on the y-axis. On the right, quantile-quantile plot (q-q plot). Notice the x-axis for the theoretical quantiles and the y-axis for sample quantiles.
